1 **Title:**

2 Phenotypes associated with genetic determinants of type I interferon regulation in the UK Biobank: a  
3 protocol

4  
5 **Authors and affiliations:**

6 Bastien Rioux<sup>1</sup>, Michael Chong<sup>2,3,4</sup>, Rosie Walker<sup>5</sup>, Sarah McGlasson<sup>1</sup>, Kristiina Rannikmäe<sup>6</sup>, Daniel  
7 McCartney<sup>7</sup>, John McCabe<sup>8,9</sup>, Robin Brown<sup>10</sup>, Yanick J Crow<sup>11,12</sup>, David Hunt<sup>1\*</sup>, William Whiteley<sup>1,13\*</sup>

8  
9 <sup>1</sup> Centre for Clinical Brain Sciences, University of Edinburgh, Edinburgh, United Kingdom

10 <sup>2</sup> Population Health Research Institute, McMaster University, Hamilton, Ontario, Canada

11 <sup>3</sup> Thrombosis and Atherosclerosis Research Institute, McMaster University, Hamilton, Ontario, Canada

12 <sup>4</sup> Department of Pathology and Molecular Medicine, McMaster University, Hamilton, Ontario, Canada

13 <sup>5</sup> Department of Psychology, University of Exeter, Exeter, United Kingdom

14 <sup>6</sup> Centre for Medical Informatics, Usher Institute, University of Edinburgh, Edinburgh, United

15 Kingdom

16 <sup>7</sup> Centre for Genomic and Experimental Medicine, Institute of Genetics and Cancer, University of

17 Edinburgh, Edinburgh, United Kingdom

18 <sup>8</sup> School of Medicine, University College Dublin, Dublin, Ireland

19 <sup>9</sup> Department of Medicine for the Elderly, Mater Misericordiae University Hospital, Dublin, Ireland

20 <sup>10</sup> Department of Clinical Neurosciences, University of Cambridge, Cambridge, United Kingdom

21 <sup>11</sup> MRC Human Genetics Unit, Institute of Genetics and Cancer, University of Edinburgh, Edinburgh,

22 United Kingdom

23 <sup>12</sup> Laboratory of Neurogenetics and Neuroinflammation, Institut Imagine, Université de Paris, Paris,

24 France

25 <sup>13</sup> MRC Population Health Unit, Nuffield Department of Population Health, University of Oxford

26

27 \* Last authors with equal contribution

28

29 **Corresponding author:**

30 Prof David Hunt

31 Centre for Clinical Brain Sciences, University of Edinburgh

32 Chancellor's Building, 49 Little France Cres, EH16 4SB

33 Edinburgh, UK

34 [david.hunt@ed.ac.uk](mailto:david.hunt@ed.ac.uk)

35

36 **Keywords:** stroke, dementia, interferonopathy, lupus, inflammation, type I interferon, genetics,

37 variants, UK Biobank

38

39 **Word count:** 3,987

40 **ABSTRACT**

41 **Introduction:** Type I interferons are cytokines involved in innate immunity against viruses. Genetic  
42 disorders of type I interferon regulation are associated with a range of autoimmune and cerebrovascular  
43 phenotypes. Carriers of pathogenic variants involved in genetic disorders of type I interferons are  
44 generally considered asymptomatic. Preliminary data suggests, however, that genetically determined  
45 dysregulation of type I interferon responses is associated with autoimmunity, and may also be relevant  
46 to sporadic cerebrovascular disease and dementia. We aim to determine whether functional variants in  
47 genes involved in type I interferon regulation and signalling are associated with the risk of  
48 autoimmunity, stroke, and dementia in a population cohort.

49 **Methods and analysis:** We will perform a hypothesis-driven candidate pathway association study of  
50 type I interferon-related genes using rare variants in the UK Biobank (UKB). We will manually curate  
51 type I interferon regulation and signalling genes from a literature review and Gene Ontology, followed  
52 by clinical and functional filtering. Variants of interest will be included based on pre-defined clinical  
53 relevance and functional annotations (using LOFTEE, M-CAP and a minor allele frequency <0.1%).  
54 The association of variants with 15 clinical and three neuroradiological phenotypes will be assessed  
55 with a rare variant genetic risk score and gene-level tests, using a Bonferroni-corrected p-value  
56 threshold from the number of genetic units and phenotypes tested. We will explore the association of  
57 significant genetic units with 196 additional health-related outcomes to help interpret their relevance  
58 and explore the clinical spectrum of genetic perturbations of type I interferon.

59 **Ethics and dissemination:** The UKB has received ethical approval from the North West Multicentre  
60 Research Ethics Committee, and all participants provided written informed consent at recruitment. This  
61 research will be conducted using the UKB Resource under application number 93,160. We expect to  
62 disseminate our results in a peer-reviewed journal and at an international cardiovascular conference.

## 63 **STRENGTHS AND LIMITATIONS OF THIS STUDY**

- 64 • The UK Biobank is the largest whole-exome sequencing project to date, with marked power to  
65 detect associations from a limited number of rare, functional variants.
- 66 • Our study will leverage current knowledge of interferon biology and genotype-phenotype  
67 correlations in Mendelian diseases of type I interferon to test biologically plausible hypotheses.
- 68 • The UK Biobank includes phenotypes from multiple sources, which improves classification  
69 accuracy for several health outcomes such as stroke and dementia.
- 70 • We will carefully select genes and variants with strong evidence of biological relevance to  
71 optimize the power of our analyses, which is particularly relevant for less common phenotypes  
72 in the UK Biobank such as systemic lupus erythematosus.
- 73 • We will increase the specificity of predicted loss-of-function variants by using stringent sample  
74 quality control and filtering criteria.

## 75 INTRODUCTION

76 Interferons are a family of innate inflammatory cytokines primarily secreted by host cells in response to  
77 viruses (type I: mainly interferon- $\alpha$  and - $\beta$ ; type II: interferon- $\gamma$ ; type III: interferon- $\lambda$ ). Interferon-  
78 stimulated genes are involved in a wide range of processes, namely cellular defence against pathogens,  
79 apoptosis, nucleic acid degradation, and cell-to-cell communication [1]. Defects in type I interferon  
80 homeostasis are associated with autoimmunity, being implicated in the pathogenesis of systemic lupus  
81 erythematosus and other autoimmune disorders such as rheumatoid arthritis, Sjögren's syndrome, and  
82 scleroderma [2]. Low-grade type I interferon upregulation may also contribute to sporadic  
83 cerebrovascular disease and dementia. Preclinical data suggest type I interferon-related vascular  
84 inflammation is an essential contributor to atherosclerosis and may be involved in cerebral small vessel  
85 disease [3, 4]. Stroke risk is increased after long-term exposure to exogenous recombinant type I  
86 interferon [4, 5], whereas white matter hyperintensities (a radiological manifestation of cerebral small  
87 vessel disease), large vessel disease and stroke are more frequent in people with systemic lupus  
88 erythematosus as compared to the general population [6, 7].

89 Genetic type I interferonopathies are a group of rare Mendelian autoinflammatory diseases  
90 hypothesised to be caused by an upregulation of type I interferons. Affected individuals with Aicardi-  
91 Goutières syndrome, the first type I interferonopathy described, most frequently present in early  
92 childhood with progressive encephalopathy, skin vasculopathy, and autoimmunity [8], in addition to  
93 prominent white matter hyperintensities, calcifications and large vessel disease (aneurysms, arterial  
94 calcifications, stenoses) on brain imaging [9]. Most, albeit not all (e.g., mutations in *IFIH1*, *STING* and  
95 *COPA*), pathogenic variants associated with type I interferonopathies result in a loss-of-function (LOF)  
96 of key interferon negative regulators inherited as autosomal recessive traits. Carriers of such pathogenic  
97 variants are generally considered asymptomatic, although growing evidence from case series suggests  
98 they may also exhibit high expression of interferon-stimulated genes [10] and have mild

99 interferonopathy-related traits [11, 12]. Uncertainty remains, however, as to whether carriers of  
100 pathogenic variants in genes involved in type I interferon signalling and regulation have an increased  
101 risk of interferonopathy-related phenotypes such as autoimmunity, cerebrovascular disease, and  
102 dementia. Moreover, the causal role of type I interferon in sporadic cerebrovascular disease and  
103 dementia has not been comprehensively assessed in a population-based study [13], and whether  
104 findings from preclinical studies and observations in conditions with impaired interferon homeostasis  
105 translate to the general population is unclear.

106 We will apply a candidate pathway approach to determine whether functional variants in genes  
107 involved in type I interferon regulation and signalling are associated with clinical and neuroradiological  
108 interferonopathy phenotypes in the general population. We hypothesize that a subset of rare functional  
109 variants that result in an upregulation of the type I interferon cascade are associated with core  
110 interferonopathy phenotypes.

111

## 112 **METHODS AND ANALYSIS**

113 We will report our results using guidance from the Strengthening the Reporting of Genetic Association  
114 Studies (STREGA) initiative [14], and present the protocol checklist in **Supplemental methods 1**. We  
115 present a graphical abstract of our protocol in **Figure 1**.

116

### 117 **Study population and exome extraction**

118 We will use data from the UK Biobank (UKB), a large population-based cohort of 502,650 participants  
119 mostly of white British ancestry who were aged 40-69 years when recruited from UK patient registries  
120 between 2006 and 2010 (response rate: 5.5%) [15, 16]. We will consider individuals with whole-exome  
121 sequencing based on the final exome data release (July 2022; n=469,807; 93.5% of participants). The  
122 exome was sequenced in two batches composed of the first 50k participants (phase 1) and all other

123 samples (phase 2). Participants in the first phase were selected to enrich certain phenotypes, which may  
124 lead to spurious associations given time-varying sequencing coverage if this batch effect is not  
125 controlled (see below).

126 Genomic DNA samples were sent to the Regeneron Genetics Centre (Tarrytown, New York,  
127 USA) as part of a collaboration with the UKB and stored at -80°C. Genomic libraries with a mean  
128 fragment size of 200 base pairs (bp) were created enzymatically and tagged with barcodes of 10 bp  
129 before capture. Exome was obtained by next generation sequencing using the Illumina NovaSeq 6000  
130 platform (S2 and S4 flow cells for the first and second phase, respectively) and a target-enrichment  
131 probe kit (IDT xGen® Exome Research Panel v1.0) to enable deep and uniform coverage of ~39 Mbp  
132 (19,396 genes).

133

#### 134 **Whole-exome sequencing data**

135 We will use the multi-sample project-level VCF (pVCF) files made available by the UKB [17]. To  
136 obtain these joint genotype data, raw sequencing outputs (FASTQs) were initially processed into  
137 sample-level aligned sequences (CRAMs) with a standard protocol (the Original Quality Functionally  
138 Equivalent; OQFE), which maps short sequences to the GRCh38 reference genome with alternate loci  
139 and marks duplicate segments [18]. DeepVariant (v0.10.0) was used to call variants from sample-level  
140 CRAMs and produce variant call data (gVCF) for each participant [19]. This calling approach uses a  
141 deep convolutional neural network to determine the most likely genotype at each locus from the  
142 reference genome, base reads and quality scores [20]. It outperforms existing state-of-the-art tools to  
143 call single nucleotide variants (SNVs) and small insertions or deletions (indels; up to 50 bp by  
144 definition), achieving high overall accuracy (>99.5%) [20, 21]. The variant call data set includes exome  
145 capture targets and their immediate flanking regions (100 bp upstream and downstream of each target).

146 Sample-level variants were aggregated into joint genotype pVCF files with a standard analysis pipeline  
147 (GLnexus v1.2.6) [19, 22].

148 For quality control, we will exclude participants with a mismatch between their genetically  
149 recorded and self-reported sex or with sex chromosome aneuploidy (~0.2%). We will apply a set of  
150 per-variant quality control metrics as previously employed for the UKB exome to analyse variants with  
151 [23]:

- 152 i) individual and variant missingness <10%;
- 153 ii) Hardy Weinberg equilibrium p-value >10<sup>-15</sup>;
- 154 iii) at least one sample per site with allele balance threshold >0.15 for SNVs and >0.20 for  
155 small indels;
- 156 iv) minimum read coverage depth of seven for SNVs and 10 for indels.

157 We will also use a sequencing depth ≥10x in 90% of samples for our rare variant analysis, to prevent  
158 spurious associations that may result from batch effect [24]. We will resolve haplotype phase with the  
159 Segmented HAPlotype Estimation and Imputation Tools version 5 (SHAPEIT5 v1.0.0), which phases  
160 rare variants from the UKB with high accuracy (switch error rate <5% with minor allele count >5) [25].

161

## 162 **Genes of interest**

163 We will apply a hypothesis-driven candidate pathway approach of type I interferon-related genes by  
164 adapting a previously described methodology [26]. We will consider for inclusion any gene encoding a  
165 protein of interest belonging to one of the three following categories:

- 166 1. A negative regulator, positive regulator, or effector along the main signalling pathway of type I  
167 interferon (**Figure 2**);
- 168 2. A protein directly affecting the activity of an interferon regulator or effector (e.g., E3 ubiquitin-  
169 protein ligase TRIM21 inhibits interferon regulatory factor 3, a transcription factor that controls



170 multiple type I interferon-inducing pathways; both proteins are therefore considered for  
171 inclusion);

172 3. A protein involved in genetic type I interferonopathies (see **Supplemental table 1**).

173 We did not consider regulatory proteins acting beyond the second order of regulation (e.g., regulators  
174 of E3 ubiquitin-protein ligase TRIM21) to adequately balance the need to include important regulators  
175 of type I interferon, while maintaining their specificity to type I interferon signalling.

176 We will produce a preliminary list of genes from i) recently published reviews on type I  
177 interferon biology and ii) annotations in Gene Ontology [27]. We present herein both completed and  
178 upcoming steps. First, we searched Ovid MEDLINE to identify reviews describing  $\geq 2$  proteins of  
179 interest in physiological conditions. We used interferons (of any type to increase the sensitivity of our  
180 search) and regulation as main concepts, in addition to a previously published hedge for reviews (**Table**  
181 **1**) [28]. We queried MEDLINE from January 2000 onwards to only include recent reviews, and  
182 conducted our search in English as we expected reviews in other languages to present similar  
183 information. Our strategy yielded 194 records. A single author (BR) will screen records by title and  
184 abstract, and include relevant articles after full-text reading. We will manually add four recent reviews  
185 [8, 9, 29, 30] on genetic interferonopathies to ensure these genes are captured. A single author (BR)  
186 will extract relevant proteins, their corresponding genes, and their presumed functions.

187 Second, we have queried the Gene Ontology resource to validate and enrich our gene set. Gene  
188 Ontology provides curated gene-specific knowledge with functional annotation and hierarchical  
189 relationships [27, 31, 32]. We extracted a list of 194 genes pertaining to 31 ontology terms relevant to  
190 type I interferon (**Supplemental table 2**). We will validate presumed gene product function from  
191 reviews and Gene Ontology on the UniProt platform [33] and the National Center for Biotechnology  
192 Information (NCBI) Gene database [34] before assigning their function (e.g., negative regulator) and

193 level of action (e.g., downstream to receptors). Discrepancies will be resolved through consensus by  
194 three authors with expertise in interferon biology (BR, SM, DH).

195 From this preliminary list of genes, we will only include those with  $\geq 1$  variant associated with a  
196 Mendelian disease through any effect on protein function to strengthen their biological relevance. We  
197 will search the Online Mendelian Inheritance in Man (OMIM) [35] and the NCBI ClinVar [36] clinical  
198 annotation databases for genotype-phenotype correlations. We will validate that all top 21 type I  
199 interferon-inducible genes in systemic lupus erythematosus are included in our list, and add missing  
200 items [37].

201

## 202 **Variants of interest**

203 We will include both SNVs and small indels in genes of interest with  $\geq 1$  of the following protein  
204 effects: i) LOF, dominant-negative, or gain-of-function (GOF) disease-causing variants through an  
205 autosomal dominant, recessive or X-linked inheritance [38], or ii) predicted LOF variants from  
206 functional annotations. We will define disease-causing variants as those reported in ClinVar (as  
207 pathogenic or likely pathogenic, excluding variants with conflicting interpretations of pathogenicity),  
208 OMIM (as disease-causing), and from discussion with clinical experts in interferonopathies (DH, SM,  
209 YC). The protein-level effect will be determined through comments and linked publications in ClinVar,  
210 descriptions in OMIM or, if undetermined, inferred from resulting phenotype.

211 We will also define a second set of putative functional variants identified in UKB participants to  
212 increase our statistical power [39]. We will assess the functional impact of these variants on Ensembl  
213 with the Variant Effect Predictor (VEP), an online resource that returns annotations on the effect of  
214 variants on transcripts and proteins [40]. We will interpret variant pathogenicity with the Loss-Of-  
215 Function Transcript Effect Estimator (LOFTEE) and the Mendelian Clinically Applicable  
216 Pathogenicity score (M-CAP v1.4). The LOFTEE filtering criteria will be used to annotate non-

217 missense predicted LOF variants, as it provides a conservative filtering strategy to increase specificity  
218 (e.g., removal of variants predicted to escape nonsense-mediated decay) and was used to annotate  
219 variants in the Genome Aggregation Database (gnomAD; a public resource of ~126k high-quality  
220 exomes from around the world that does not include UKB data) [41] and Genebase (a public resource  
221 of exome-based genotype-phenotype associations within the UKB) [42]. The M-CAP score will be  
222 used to interpret pathogenicity and nominate missense variants for inclusion [43]. This supervised  
223 learning classifier incorporates nine established pathogenicity likelihood scores (namely SIFT and  
224 PolyPhen-2) and achieves substantial reduction in the misclassification rate of known pathogenic  
225 variants (<5%) as compared to other existing methods (26-38%) [43]. We will define predicted LOF  
226 variants as either i) variants that inactivate a protein-coding gene through a premature stop codon, a  
227 shift in the transcriptional frame or an alteration of essential splice-site nucleotides (from LOFTEE), or  
228 ii) missense variants classified as likely pathogenic (from M-CAP). We will apply a minor allele  
229 frequency (MAF) threshold <0.1% in both the UKB and gnomAD to lower the probability of including  
230 benign variants and improve our statistical power. Using a more liberal MAF threshold of <1%, 8.03  
231 million SNVs were identified in ~200k UKB participants, of which 5.4% (~450k) were predicted LOF  
232 variants [23]. In gnomAD, which used LOFTEE without MAF threshold, about 40% of genes had >10  
233 predicted LOF variants [41].

234

### 235 **Phenotypes of interest**

236 We will test the association of selected variants with a set of 15 clinical and three neuroradiological  
237 phenotypes of interest in the UKB. These phenotypes were selected based on their frequency in the  
238 general population and the UKB, the plausibility of their association with type I interferon  
239 upregulation, and from type I interferonopathy clinical presentations (including Mendelian and  
240 sporadic diseases). The International Classification of Diseases (ICD) diagnostic codes and UKB fields

241 for each phenotype are presented in **Supplemental table 3**. Genes associated with  $\geq 1$  phenotype of  
242 interest will be assessed for their association with 196 clinical phenotypes to help interpret their  
243 relevance (**Supplemental table 4**). We manually grouped ICD-coded diagnoses by pathophysiology to  
244 reduce multiple testing and improve power for less common conditions. As part of the phenome  
245 analysis, we will test two stroke definitions developed by Rannikmäe et al [44] to help explain potential  
246 misclassifications.

247 Health-related outcomes were captured through self-completed questionnaires followed by a  
248 nurse-led interview on past medical history (at baseline in all and during follow-up for some  
249 participants), as well as data linkage with ICD-coded hospital admissions from National Health Service  
250 (NHS) registries (primary or secondary diagnoses; ICD v9 and v10) and national death registries  
251 (primary and secondary causes of death; ICD v10). Diagnostic codes from primary care (Read codes v2  
252 and v3) are available in a subset of participants (~45.8%). Cancer diagnoses (ICD v9 and v10) are  
253 available through data linkage with national cancer registries. Stroke diagnoses from hospital and death  
254 registries have a high sensitivity (point estimate range: 88-94%) and specificity (>99%) [45]. Most  
255 stroke cases in the UKB are from hospital and death registries, although ~27% are self-reported without  
256 coded diagnosis [44]. Self-reported strokes have a lower sensitivity (79%) but maintain a high  
257 specificity (99%) [46]. In-hospital and death records for all-cause dementia in the UKB have a positive  
258 predicted value of ~85% [47].

259 We will define phenotypes in the UKB using algorithmically defined (or adjudicated) outcomes  
260 (v2.0), first diagnostic occurrences, and cancer registries. Algorithmically defined outcomes are custom  
261 diagnostic classification schemes developed by the UKB from self-reports, hospital admissions and  
262 death registries to optimize their positive predictive value. First diagnostic occurrences map clinical  
263 terms from all available sources into ICD v10 codes (apart from cancer registries). Algorithmically  
264 defined outcomes and first diagnostic occurrences will be combined to identify any stroke, ischemic

265 stroke, intracerebral haemorrhage, subarachnoid haemorrhage, all-cause dementia, Alzheimer's  
266 disease, vascular dementia, Parkinson's disease and myocardial infarction [48]. We chose to combine  
267 these two fields to capture primary care events (not included in algorithmically defined outcomes),  
268 which is expected to increase the number of cases from 0.7% (n=55) for all-cause dementia to 11.4%  
269 (n=1,376) for ischemic stroke. First diagnostic occurrences will be used alone for other non-cancerous  
270 conditions. Data from cancer registries will be used to define malignant neoplasms.

271 We will define three neuroradiological phenotypes: total white matter hyperintensity (WMH)  
272 volume, total brain (grey plus white matter) volume, and hippocampal grey matter (mean) volume [49].  
273 Brain magnetic resonance imaging (MRI) scans were obtained in ~42k participants on 3T Siemens  
274 Skyra scanners running VD13A SP4 with a standard Siemens 32-channel radio-frequency receiver  
275 head coil. The UKB MRI quality control pipeline includes a pre-processing step to correct for head  
276 motion and other artifacts followed by automated identification of equipment failure and excessive  
277 artifacts [50]. We will normalize WMH and hippocampal grey matter volumes for head size using the  
278 UKB scaling factor derived from the external surface of the skull. The normalized total brain volume is  
279 available as an imaging-derived phenotype. We will log-transform WMH volumes given their right-  
280 skewed (log-normal) distribution.

281 The total WMH volume of presumed vascular origin per individual was generated by an image-  
282 processing pipeline [50] followed by a segmentation algorithm (the Brain Intensity Abnormality  
283 Classification Algorithm tool; BIANCA) using both T1- and T2-weighted/fluid-attenuated inversion  
284 recovery (FLAIR) sequences [51]. The algorithm results in high volumetric agreement (intraclass  
285 correlation coefficient = 0.99) and very good spatial overlap index (dice similarity index = 0.76) with  
286 manual segmentation. Total brain (including the cerebellum and the brainstem, as low as space-based  
287 brain masking allows) and regional brain volumes were extracted using tissue-segmented images  
288 obtained from an automated algorithm (FMRIB's Automated Segmentation Tool; FAST) [52] and

289 passed on to the SIENAX analysis pipeline to accurately measure volumetric phenotypes (relative  
290 mean error in brain volume = 0.4%) [53]. We will use the mean hippocampal grey matter volume (from  
291 right and left hippocampi) as this radiological marker of hippocampal atrophy is associated with  
292 memory loss and progression to Alzheimer's disease [54].

293

## 294 **Statistical analyses**

295 Our primary (score-based) analysis will test the association of all selected genes modelled into a rare  
296 variant genetic risk score (RVGRS) with individual phenotypes. We will regress each phenotype on  
297 standardized scores using logistic and linear regressions for binary and continuous outcomes,  
298 respectively. We will adapt a previously described methodology [55] to define our score as the  
299 weighted sum of the number of variants per individual  $i$  and gene  $g$  ( $V_{i,g}$ ), given a set of  $M$  genes:

$$300 \quad RVGRS_i = \sum_{g=1}^M \beta_g V_{i,g}$$

301 Gene-level weights will be allocated from theoretical variant effects on the type I interferon cascade.  
302 For example, LOF variants in genes encoding negative regulators will receive a positive weight (+1) as  
303 they are expected to upregulate the cascade, whereas those in genes encoding positive regulators or  
304 effectors will receive a negative weight (-1). We chose this conservative weighting method given the  
305 technical limitations of weighting variants from a transcriptomic signature (unavailable in the UKB) or  
306 a proteomic profile (no measurement of type I interferon in the UKB Olink proteomics).

307 Our secondary analysis will test gene-level associations with individual phenotypes using the  
308 optimal sequence kernel association test (SKAT-O) framed into SAIGE-GENE+. The SKAT-O test  
309 leverages the advantages of burden tests and SKAT through a linear combination of their test statistics,  
310 the relative contribution of which are estimated by a correlation term [56]. We chose this method to  
311 balance the need to maximise power for genes that have a higher proportion of causal variants  
312 satisfying the burden test assumption, while preserving power for genes that may have fewer causal

313 variants (or variants with heterogeneous effects) despite our filtering strategy. The SAIGE-GENE+  
314 method builds upon SKAT-O to reduce type I error inflation for very rare variants in large biobanks  
315 with unbalanced case-control ratios, reduce computational resources and account for sample  
316 relatedness [57]. We will use a relatedness coefficient cut-off of  $\geq 0.125$  (up to third-degree relatedness)  
317 in SAIGE-GENE+, and perform our analyses using the open-source R package *SAIGE*  
318 (<https://github.com/saigegit/SAIGE>). We will include the first 10 genetic principal components in the  
319 gene-level (combined with the generalized mixed model approach in SAIGE-GENE+) and RVGRS  
320 models to control for population structure [58], in addition to adjusting for age and sex [59]. We will  
321 also adjust for scanner site in neuroradiological analyses to control for potential technical confounding  
322 [60]. We will run separate gene-level tests for LOF/dominant negative and GOF variants to account for  
323 their anticipated opposite effect directions. As SKAT-O is designed to test the overall gene-trait  
324 association and does not produce effect sizes, variant-level effects will be obtained through separate  
325 logistic and linear regressions to help interpret p-values (as in Genebass). Genetic units with  $< 10$   
326 carriers of any variant in the UKB will not be analysed to preserve power.

327 Our score and individual genes will be tested for their association with each phenotype of  
328 interest ( $n=18$ ), and those with  $\geq 1$  statistically significant association with any phenotype of interest  
329 will be tested for associations across the phenome ( $n=196$ ). We will interpret statistical significance in  
330 our score-based analysis with a Bonferroni-corrected p-value threshold to account for multiple testing  
331 across phenotypes (phenotypes of interest:  $0.05/18=2.78 \times 10^{-3}$ ; phenome:  $0.05/196=2.55 \times 10^{-4}$ ). We will  
332 interpret statistical significance in our gene-level analysis similarly, with a more stringent correction to  
333 account for multiple testing across genes and phenotypes ( $0.05/[\# \text{ phenotypes} \times \# \text{ gene-level units}]$ )  
334 [61]. Our analyses will be conducted on the UK Biobank Research Analysis Platform [62]. We present  
335 our pre-planned sensitivity analyses in **Supplemental methods 2**.

336

### 337 **Power calculations**

338 We performed a statistical power analysis for our gene-level tests and phenotypes of interest with  
339 SKAT-O using the *SKAT* package (v2.2.5) for R. Our results and analysis parameters are presented in  
340 **Figure 3** and detailed in **Supplemental methods 3**. Gene-level tests for lupus and vascular dementia  
341 have the lowest powers overall although they increase to reasonable values in more optimistic  
342 scenarios. Other cardiovascular and inflammatory outcomes have the highest power throughout all  
343 scenarios.

344

### 345 **DISCUSSION**

346 Comprehensive phenotyping of interferonopathy variant carriers may expand the clinical spectrum of  
347 genetic type I interferonopathies and help understand the biological relevance of type I interferon  
348 dysregulation in the general population. Importantly, large population-based assessments of  
349 interferonopathy carriers are lacking. Our study will leverage knowledge of Mendelian diseases of type  
350 I interferon to develop an informed, hypothesis-driven candidate pathway approach to investigate the  
351 frequency and phenotype associations of low-grade type I interferon dysregulation in the UKB. Our  
352 results will help understand the clinical spectrum of genetic type I interferonopathies, and will provide  
353 insights into the role of type I interferon in sporadic conditions.

354 Recent meta-analyses of genome-wide association studies (GWASs) have strengthened the case  
355 of inflammatory contributors to stroke and dementia. The largest cross-ancestry GWAS meta-analysis  
356 on stroke to date identified 89 independent genomic risk loci, of which two newly reported loci were  
357 located near or within genes involved in type I interferon regulation or signalling (*PTPN11* and *TAP1*)  
358 [63]. A recent large GWAS meta-analysis on Alzheimer's disease and related dementias identified 33  
359 known and 42 new genomic loci, for which a pathway analysis exposed significant gene sets related to  
360 immunity, including macrophage and microglia activation [64]. The nearest genes of two new lead



361 variants, *SHARPIN* and *RBCK1*, encode essential components of the linear ubiquitin chain assembly  
362 complex (LUBAC), involved in NF- $\kappa$ B activation. Despite these discoveries, GWASs are unable to  
363 identify rarer alleles that may carry important information on the biology of complex traits, while most  
364 variants in genomic risk loci are mapped outside coding regions and have unknown regulatory  
365 functions [65, 66].

366

### 367 **Strengths and limitations**

368 The UKB is the largest whole-exome sequencing project to date, markedly improving power to detect  
369 associations from a limited number of rare, functional variants [67]. Our informed approach will  
370 leverage current knowledge on type I interferon biology to reduce noise and test biologically plausible  
371 hypotheses. This contrasts with prior hypothesis-free phenome-wide association studies using rare  
372 variants in the UKB such as Genebass [42] and PheWAS [68], which did not include clinical  
373 annotations, used uncurated phenotypes, introduced greater multiple-testing burden (~4.5k and ~17k  
374 phenotypes tested in Genebass and PheWAS, respectively), and often used small sample sizes (as few  
375 as 30 cases/phenotype in PheWAS). The UKB also enables phenotyping from multiple sources,  
376 improving the classification accuracy for stroke and dementia as compared to studies using minimal  
377 phenotyping (e.g., case definition from self-reported dementia in relatives) [64].

378 Our study, however, will have some limitations. First, we expect that our weighting strategy  
379 based on theoretical knowledge will introduce noise into our score. We were technically unable to  
380 reliably assign empirical weights because of the lack of relevant transcript or protein measurements in  
381 the UKB. We anticipate this noise will be reduced by carefully selecting genes for which variants have  
382 a higher likelihood of functional and clinical consequences. We will also test genes individually as an  
383 alternative that does not mandate weights. Second, we anticipate some degree of residual pleiotropy  
384 through overlapping inflammatory and non-inflammatory pathways despite our careful curation of

385 genes to increase specificity to the type I interferon cascade. We will, however, explore the relevance  
386 of pleiotropic effects on our results with a proteomic sensitivity analysis (**Supplemental methods 2**).  
387 Third, although we will optimize our overall power by carefully selecting clinically relevant genes and  
388 functional variants, our power will likely remain lower for rarer phenotypes.

389

## 390 **ETHICS AND DISSEMINATION**

391 The UKB has received ethical approval from the North West Multicentre Research Ethics Committee,  
392 and all participants provided written informed consent at recruitment. This research will be conducted  
393 using the UKB Resource under application number 93,160. We expect to disseminate our results in a  
394 peer-reviewed journal and at an international cardiovascular conference.

## 395 **FIGURE LEGENDS**

### 396 **Figure 1. Graphical summary of the study methodology.**

397 This summary illustrates the three main steps of the study: i) genes of interest will be identified from a  
398 literature review and Gene Ontology, followed by clinical and functional filtering, ii) variants of  
399 interest will be included based on their clinical relevance and functional annotations, and iii) the  
400 association of variants and phenotypes will be tested with a rare variant genetic risk score and gene-  
401 level tests. Abbreviations: LOFTEE, Loss-Of-Function Transcript Effect Estimator; M-CAP,  
402 Mendelian Clinically Applicable Pathogenicity score; NCBI, National Center for Biotechnology  
403 Information; OMIM, Online Mendelian Inheritance in Man; OQFE, Original Quality Functionally  
404 Equivalent; pLOF, predicted loss-of-function; SKAT-O, optimal sequence kernel association test; VEP,  
405 Variant Effect Predictor. Created with BioRender.com.

406

### 407 **Figure 2. Overview of the interferon cascade.**

408 Graphical overview of the main steps involved in interferon regulation and signalling. Endogenous  
409 nucleases (blue circle sectors) remove nucleic acids (red confetti) that can trigger interferon production.  
410 Abnormal accumulation of endogenous material through impaired regulation (box 1) and viral nucleic  
411 acids (not shown) can trigger interferon production through linkage to i) toll-like receptor sensors at the  
412 cell membrane surface (not shown) and at endosomes, and ii) cytoplasmic sensors (box 2). Interferons  
413 are sensed by cell surface receptors specific to types I (heterodimer with subunits IFNAR1 and  
414 IFNAR2), II (heterotetramer with two IFNGR1 and two IFNGR2 subunits) and III (heterodimer with  
415 subunits IFNLR1 and IL-10R2) ligands. Signal transduction and intracellular signalling through JAK-  
416 STAT activates the transcription of interferon-stimulated genes (box 3). Abbreviations: GAS, gamma-  
417 activated sequence; IFN, interferon; IRF, interferon regulatory factor; ISG, interferon-stimulated gene;  
418 ISRE, interferon-stimulated response element; TLR, toll-like receptor. Created with BioRender.com.

419 **Figure 3. Power calculations for gene-level tests with phenotypes of interest using SKAT-O.**

420 The power calculation assumes an  $\alpha=1.11 \times 10^{-5}$ , a genetic sampling length of 2,962 bp, a MAF <0.1%,  
421 an empirical optimal correlation coefficient, and sample sizes observed in the UKB. Abbreviations:  
422 AD, Alzheimer's disease; AF, atrial fibrillation; bp, base pairs; BrV, total brain (grey plus white  
423 matter) volume; CKD, chronic kidney disease; Dem, all-cause dementia; HipV, hippocampal grey  
424 matter volume (average); IBD, inflammatory bowel disease; ICH, intracerebral haemorrhage; IHD,  
425 ischemic heart disease; IS, ischemic stroke; MAF, minor allele frequency; PAD, peripheral artery  
426 disease; RA, rheumatoid arthritis; SAH, subarachnoid haemorrhage; SCTD, systemic connective tissue  
427 disorder; SLE, systemic lupus erythematosus; VascD, vascular dementia; WMHV, total white matter  
428 hyperintensity volume.

## TABLES

**Table 1. Ovid MEDLINE search strategy.**

| Line                | Entry                                              | Records |
|---------------------|----------------------------------------------------|---------|
| Interferon concept  |                                                    |         |
| 1                   | (cytokine* adj (inflammat* or proinflammat*)).tw.  | 422     |
| 2                   | IFN*.ti.                                           | 15433   |
| 3                   | Interferons/                                       | 25640   |
| 4                   | 1 or 2 or 3                                        | 40607   |
| Regulation concept  |                                                    |         |
| 5                   | (regulat* or metabolism or biology or function).ti | 1191801 |
| Review design hedge |                                                    |         |
| 6                   | meta analysis.mp,pt. or review.pt. or search:.tw.  | 3563440 |
| Combine concepts    |                                                    |         |
| 7                   | 4 and 5 and 6                                      | 390     |
| 8                   | 7 not ((exp animal/ or nonhuman/) not exp human/)  | 357     |
| 9                   | 8 not (case study/ or case report/)                | 356     |
| 10                  | limit 9 to dt=20000101-20230110                    | 214     |
| 11                  | limit 10 to English language                       | 194     |

This table presents the search strategy conducted in Ovid MEDLINE on 10 January 2023. Abbreviations: adj, adjacent; dt, create date; exp, explode; mp, multi-purpose fields; pt, publication type; ti, text word in title; tw, text word in title and abstract.

429 **REFERENCES**

- 430 1. Schneider WM, Chevillotte MD, Rice CM. Interferon-stimulated genes: a complex web of host  
431 defenses. *Annu Rev Immunol* 2014;32:513-45. doi: 10.1146/annurev-immunol-032713-120231  
432 [published Online First: 2014/02/22]
- 433 2. Crow MK, Olfieriev M, Kirou KA. Type I Interferons in Autoimmune Disease. *Annual Review of*  
434 *Pathology: Mechanisms of Disease* 2019;14(1):369-93. doi: 10.1146/annurev-pathol-020117-  
435 043952
- 436 3. Boshuizen MC, de Winther MP. Interferons as Essential Modulators of Atherosclerosis. *Arterioscler*  
437 *Thromb Vasc Biol* 2015;35(7):1579-88. doi: 10.1161/ATVBAHA.115.305464 [published  
438 Online First: 2015/05/09]
- 439 4. Kavanagh D, McGlasson S, Jury A, et al. Type I interferon causes thrombotic microangiopathy by a  
440 dose-dependent toxic effect on the microvasculature. *Blood* 2016;128(24):2824-33. doi:  
441 10.1182/blood-2016-05-715987 [published Online First: 2016/09/25]
- 442 5. de Jong HJI, Kingwell E, Shirani A, et al. Evaluating the safety of beta-interferons in MS: A series  
443 of nested case-control studies. *Neurology* 2017;88(24):2310-20. doi:  
444 10.1212/WNL.0000000000004037 [published Online First: 20170512]
- 445 6. Gao N, Kong M, Li X, et al. Systemic Lupus Erythematosus and Cardiovascular Disease: A  
446 Mendelian Randomization Study. *Front Immunol* 2022;13:908831. doi:  
447 10.3389/fimmu.2022.908831 [published Online First: 2022/06/24]
- 448 7. de Amorim LC, Maia FM, Rodrigues CE. Stroke in systemic lupus erythematosus and  
449 antiphospholipid syndrome: risk factors, clinical manifestations, neuroimaging, and treatment.  
450 *Lupus* 2017;26(5):529-36. doi: 10.1177/0961203316688784 [published Online First:  
451 2017/04/11]

- 452 8. Rodero MP, Crow YJ. Type I interferon-mediated monogenic autoinflammation: The type I  
453 interferonopathies, a conceptual overview. *J Exp Med* 2016;213(12):2527-38. doi:  
454 10.1084/jem.20161596 [published Online First: 2016/11/09]
- 455 9. Crow YJ, Manel N. Aicardi-Goutieres syndrome and the type I interferonopathies. *Nat Rev Immunol*  
456 2015;15(7):429-40. doi: 10.1038/nri3850 [published Online First: 2015/06/09]
- 457 10. Rice GI, Kasher PR, Forte GM, et al. Mutations in ADAR1 cause Aicardi-Goutieres syndrome  
458 associated with a type I interferon signature. *Nat Genet* 2012;44(11):1243-8. doi:  
459 10.1038/ng.2414 [published Online First: 2012/09/25]
- 460 11. Briggs TA, Rice GI, Adib N, et al. Spondyloenchondrodysplasia Due to Mutations in ACP5: A  
461 Comprehensive Survey. *Journal of Clinical Immunology* 2016;36(3):220-34. doi:  
462 10.1007/s10875-016-0252-y
- 463 12. Gunther C, Kind B, Reijns MA, et al. Defective removal of ribonucleotides from DNA promotes  
464 systemic autoimmunity. *J Clin Invest* 2015;125(1):413-24. doi: 10.1172/JCI78001 [published  
465 Online First: 20141215]
- 466 13. Kelly PJ, Lemmens R, Tsivgoulis G. Inflammation and Stroke Risk: A New Target for Prevention.  
467 *Stroke* 2021:STROKEAHA121034388. doi: 10.1161/STROKEAHA.121.034388 [published  
468 Online First: 2021/06/25]
- 469 14. Little J, Higgins JP, Ioannidis JP, et al. Strengthening the reporting of genetic association studies  
470 (STREGA): an extension of the STROBE statement. *Eur J Epidemiol* 2009;24(1):37-55. doi:  
471 10.1007/s10654-008-9302-y [published Online First: 2009/02/04]
- 472 15. Hewitt J, Walters M, Padmanabhan S, et al. Cohort profile of the UK Biobank: diagnosis and  
473 characteristics of cerebrovascular disease. *BMJ Open* 2016;6(3):e009161. doi:  
474 10.1136/bmjopen-2015-009161 [published Online First: 2016/03/24]

- 475 16. Sudlow C, Gallacher J, Allen N, et al. UK biobank: an open access resource for identifying the  
476 causes of a wide range of complex diseases of middle and old age. *PLoS Med*  
477 2015;12(3):e1001779. doi: 10.1371/journal.pmed.1001779 [published Online First: 2015/04/01]
- 478 17. UK Biobank. UK Biobank Whole Exome Sequencing Protocol (September 2021) 2022 [Available  
479 from: <https://biobank.ndph.ox.ac.uk/showcase/refer.cgi?id=915>] accessed 10 October, 2022.
- 480 18. Regier AA, Farjoun Y, Larson DE, et al. Functional equivalence of genome sequencing analysis  
481 pipelines enables harmonized variant calling across human genetics projects. *Nat Commun*  
482 2018;9(1):4038. doi: 10.1038/s41467-018-06159-4 [published Online First: 2018/10/04]
- 483 19. Yun T, Li H, Chang P-C, et al. Accurate, scalable cohort variant calls using DeepVariant and  
484 GLnexus. *Bioinformatics* 2021;36(24):5582-89. doi: 10.1093/bioinformatics/btaa1081
- 485 20. Poplin R, Chang P-C, Alexander D, et al. A universal SNP and small-indel variant caller using deep  
486 neural networks. *Nature Biotechnology* 2018;36(10):983-87. doi: 10.1038/nbt.4235
- 487 21. Lin Y-L, Chang P-C, Hsu C, et al. Comparison of GATK and DeepVariant by trio sequencing.  
488 *Scientific Reports* 2022;12(1):1809. doi: 10.1038/s41598-022-05833-4
- 489 22. Lin MF, Rodeh O, Penn J, et al. GLnexus: joint variant calling for large cohort sequencing. *bioRxiv*  
490 2018:343970. doi: 10.1101/343970
- 491 23. Szustakowski JD, Balasubramanian S, Kvikstad E, et al. Advancing human genetics research and  
492 drug discovery through exome sequencing of the UK Biobank. *Nature Genetics*  
493 2021;53(7):942-48. doi: 10.1038/s41588-021-00885-0
- 494 24. UK Biobank. UK Biobank Whole Exome Sequencing 300k Release: Analysis Best Practices 2021  
495 [Available from: [https://www.ukbiobank.ac.uk/media/najcnoaz/access\\_064-uk-biobank-exome-](https://www.ukbiobank.ac.uk/media/najcnoaz/access_064-uk-biobank-exome-release-faq_v11-1_final-002.pdf)  
496 [release-faq\\_v11-1\\_final-002.pdf](https://www.ukbiobank.ac.uk/media/najcnoaz/access_064-uk-biobank-exome-release-faq_v11-1_final-002.pdf)] accessed 10 October, 2022.



- 497 25. Hofmeister RJ, Ribeiro DM, Rubinacci S, et al. Accurate rare variant phasing of whole-genome and  
498 whole-exome sequencing data in the UK Biobank. *bioRxiv* 2022:2022.10.19.512867. doi:  
499 10.1101/2022.10.19.512867
- 500 26. Sharafeldin N, Slattery ML, Liu Q, et al. A Candidate-Pathway Approach to Identify Gene-  
501 Environment Interactions: Analyses of Colon Cancer Risk and Survival. *J Natl Cancer Inst*  
502 2015;107(9) doi: 10.1093/jnci/djv160 [published Online First: 20150613]
- 503 27. Gene Ontology Consortium. The Gene Ontology resource: enriching a GOld mine. *Nucleic Acids*  
504 *Res* 2021;49(D1):D325-D34. doi: 10.1093/nar/gkaa1113
- 505 28. Health Information Research Unit (McMaster University). Hedges 2016 [Available from:  
506 [https://hiru.mcmaster.ca/hiru/HIRU\\_Hedges\\_MEDLINE\\_Strategies.aspx#Reviews](https://hiru.mcmaster.ca/hiru/HIRU_Hedges_MEDLINE_Strategies.aspx#Reviews)] accessed  
507 10 January, 2023.
- 508 29. Eleftheriou D, Brogan PA. Genetic interferonopathies: An overview. *Best Pract Res Clin*  
509 *Rheumatol* 2017;31(4):441-59. doi: 10.1016/j.berh.2017.12.002 [published Online First:  
510 2018/05/19]
- 511 30. Crow YJ, Stetson DB. The type I interferonopathies: 10 years on. *Nature Reviews Immunology*  
512 2022;22(8):471-83. doi: 10.1038/s41577-021-00633-9
- 513 31. Carbon S, Ireland A, Mungall CJ, et al. AmiGO: online access to ontology and annotation data.  
514 *Bioinformatics* 2009;25(2):288-9. doi: 10.1093/bioinformatics/btn615 [published Online First:  
515 20081125]
- 516 32. Ashburner M, Ball CA, Blake JA, et al. Gene ontology: tool for the unification of biology. The  
517 Gene Ontology Consortium. *Nat Genet* 2000;25(1):25-9. doi: 10.1038/75556
- 518 33. UniProt C. UniProt: the Universal Protein Knowledgebase in 2023. *Nucleic Acids Res* 2022 doi:  
519 10.1093/nar/gkac1052 [published Online First: 20221121]

- 520 34. National Center for Biotechnology Information. Gene 2022 [Available from:  
521 <https://www.ncbi.nlm.nih.gov/gene>] accessed October 14, 2022.
- 522 35. McKusick-Nathans Institute of Genetic Medicine - Johns Hopkins University. Online Mendelian  
523 Inheritance in Man (OMIM) [Available from: <https://omim.org/>] accessed November 1, 2022.
- 524 36. Landrum MJ, Lee JM, Benson M, et al. ClinVar: improving access to variant interpretations and  
525 supporting evidence. *Nucleic Acids Res* 2018;46(D1):D1062-D67. doi: 10.1093/nar/gkx1153  
526 [published Online First: 2017/11/23]
- 527 37. Yao Y, Higgs BW, Morehouse C, et al. Development of Potential Pharmacodynamic and  
528 Diagnostic Markers for Anti-IFN- $\alpha$  Monoclonal Antibody Trials in Systemic Lupus  
529 Erythematosus. *Hum Genomics Proteomics* 2009;2009 doi: 10.4061/2009/374312 [published  
530 Online First: 20091117]
- 531 38. Backwell L, Marsh JA. Diverse Molecular Mechanisms Underlying Pathogenic Protein Mutations:  
532 Beyond the Loss-of-Function Paradigm. *Annu Rev Genomics Hum Genet* 2022;23:475-98. doi:  
533 10.1146/annurev-genom-111221-103208 [published Online First: 20220408]
- 534 39. Shameer K, Tripathi LP, Kalari KR, et al. Interpreting functional effects of coding variants:  
535 challenges in proteome-scale prediction, annotation and assessment. *Brief Bioinform*  
536 2016;17(5):841-62. doi: 10.1093/bib/bbv084 [published Online First: 2015/10/24]
- 537 40. McLaren W, Gil L, Hunt SE, et al. The Ensembl Variant Effect Predictor. *Genome Biol*  
538 2016;17(1):122. doi: 10.1186/s13059-016-0974-4 [published Online First: 2016/06/09]
- 539 41. Karczewski KJ, Francioli LC, Tiao G, et al. The mutational constraint spectrum quantified from  
540 variation in 141,456 humans. *Nature* 2020;581(7809):434-43. doi: 10.1038/s41586-020-2308-7  
541 [published Online First: 2020/05/29]

- 542 42. Karczewski KJ, Solomonson M, Chao KR, et al. Systematic single-variant and gene-based  
543 association testing of thousands of phenotypes in 394,841 UK Biobank exomes. *Cell Genomics*  
544 2022;2(9):100168. doi: <https://doi.org/10.1016/j.xgen.2022.100168>
- 545 43. Jagadeesh KA, Wenger AM, Berger MJ, et al. M-CAP eliminates a majority of variants of  
546 uncertain significance in clinical exomes at high sensitivity. *Nature Genetics* 2016;48(12):1581-  
547 86. doi: 10.1038/ng.3703
- 548 44. Rannikmae K, Rawlik K, Ferguson AC, et al. Physician-Confirmed and Administrative Definitions  
549 of Stroke in UK Biobank Reflect the Same Underlying Genetic Trait. *Front Neurol*  
550 2021;12:787107. doi: 10.3389/fneur.2021.787107 [published Online First: 2022/02/22]
- 551 45. Woodfield R, Grant I, Group UKBSO, et al. Accuracy of Electronic Health Record Data for  
552 Identifying Stroke Cases in Large-Scale Epidemiological Studies: A Systematic Review from  
553 the UK Biobank Stroke Outcomes Group. *PLoS One* 2015;10(10):e0140533. doi:  
554 10.1371/journal.pone.0140533 [published Online First: 2015/10/27]
- 555 46. Jones WJ, Williams LS, Meschia JF. Validating the Questionnaire for Verifying Stroke-Free Status  
556 (QVSFS) by neurological history and examination. *Stroke* 2001;32(10):2232-6. doi:  
557 10.1161/hs1001.096191
- 558 47. Wilkinson T, Schnier C, Bush K, et al. Identifying dementia outcomes in UK Biobank: a validation  
559 study of primary care, hospital admissions and mortality data. *Eur J Epidemiol* 2019;34(6):557-  
560 65. doi: 10.1007/s10654-019-00499-1 [published Online First: 2019/02/27]
- 561 48. UK Biobank Outcome Adjudication Group. Algorithmically-defined outcomes (version 2.0): UK  
562 Biobank, 2022:28.
- 563 49. Shang X, Zhang X, Huang Y, et al. Association of a wide range of individual chronic diseases and  
564 their multimorbidity with brain volumes in the UK Biobank: A cross-sectional study.  
565 *eClinicalMedicine* 2022;47 doi: 10.1016/j.eclinm.2022.101413

- 566 50. Alfaro-Almagro F, Jenkinson M, Bangerter NK, et al. Image processing and Quality Control for the  
567 first 10,000 brain imaging datasets from UK Biobank. *Neuroimage* 2018;166:400-24. doi:  
568 10.1016/j.neuroimage.2017.10.034 [published Online First: 2017/10/29]
- 569 51. Griffanti L, Zamboni G, Khan A, et al. BIANCA (Brain Intensity AbNormality Classification  
570 Algorithm): A new tool for automated segmentation of white matter hyperintensities.  
571 *Neuroimage* 2016;141:191-205. doi: 10.1016/j.neuroimage.2016.07.018 [published Online  
572 First: 2016/07/13]
- 573 52. Zhang Y, Brady M, Smith S. Segmentation of brain MR images through a hidden Markov random  
574 field model and the expectation-maximization algorithm. *IEEE Trans Med Imaging*  
575 2001;20(1):45-57. doi: 10.1109/42.906424
- 576 53. Smith SM, Zhang Y, Jenkinson M, et al. Accurate, robust, and automated longitudinal and cross-  
577 sectional brain change analysis. *Neuroimage* 2002;17(1):479-89. doi: 10.1006/nimg.2002.1040
- 578 54. Mielke MM, Okonkwo OC, Oishi K, et al. Fornix integrity and hippocampal volume predict  
579 memory decline and progression to Alzheimer's disease. *Alzheimers Dement* 2012;8(2):105-13.  
580 doi: 10.1016/j.jalz.2011.05.2416
- 581 55. Lali R, Chong M, Omid A, et al. Calibrated rare variant genetic risk scores for complex disease  
582 prediction using large exome sequence repositories. *Nat Commun* 2021;12(1):5852. doi:  
583 10.1038/s41467-021-26114-0 [published Online First: 2021/10/08]
- 584 56. Lee S, Wu MC, Lin X. Optimal tests for rare variant effects in sequencing association studies.  
585 *Biostatistics* 2012;13(4):762-75. doi: 10.1093/biostatistics/kxs014 [published Online First:  
586 20120614]
- 587 57. Zhou W, Bi W, Zhao Z, et al. SAIGE-GENE+ improves the efficiency and accuracy of set-based  
588 rare variant association tests. *Nat Genet* 2022;54(10):1466-69. doi: 10.1038/s41588-022-01178-  
589 w [published Online First: 20220922]

- 590 58. Zhang Y, Pan W. Principal component regression and linear mixed model in association analysis of  
591 structured samples: competitors or complements? *Genet Epidemiol* 2015;39(3):149-55. doi:  
592 10.1002/gepi.21879 [published Online First: 20141223]
- 593 59. Schisterman EF, Cole SR, Platt RW. Overadjustment bias and unnecessary adjustment in  
594 epidemiologic studies. *Epidemiology* 2009;20(4):488-95. doi: 10.1097/EDE.0b013e3181a819a1  
595 [published Online First: 2009/06/16]
- 596 60. Alfaro-Almagro F, McCarthy P, Afyouni S, et al. Confound modelling in UK Biobank brain  
597 imaging. *Neuroimage* 2021;224:117002. doi: 10.1016/j.neuroimage.2020.117002 [published  
598 Online First: 20200602]
- 599 61. Storey JD, Tibshirani R. Statistical significance for genomewide studies. *Proc Natl Acad Sci U S A*  
600 2003;100(16):9440-5. doi: 10.1073/pnas.1530509100 [published Online First: 2003/07/29]
- 601 62. UK Biobank. Research Analysis Platform: Tools Library 2022 [Available from:  
602 [https://dnanexus.gitbook.io/uk-biobank-rap/working-on-the-research-analysis-platform/tools-](https://dnanexus.gitbook.io/uk-biobank-rap/working-on-the-research-analysis-platform/tools-library)  
603 [library](https://dnanexus.gitbook.io/uk-biobank-rap/working-on-the-research-analysis-platform/tools-library)] accessed November 16, 2022.
- 604 63. Mishra A, Malik R, Hachiya T, et al. Stroke genetics informs drug discovery and risk prediction  
605 across ancestries. *Nature* 2022 doi: 10.1038/s41586-022-05165-3 [published Online First:  
606 2022/10/01]
- 607 64. Bellenguez C, Küçükali F, Jansen IE, et al. New insights into the genetic etiology of Alzheimer's  
608 disease and related dementias. *Nature Genetics* 2022;54(4):412-36. doi: 10.1038/s41588-022-  
609 01024-z
- 610 65. Uffelmann E, Huang QQ, Munung NS, et al. Genome-wide association studies. *Nature Reviews*  
611 *Methods Primers* 2021;1(1):59. doi: 10.1038/s43586-021-00056-9

- 612 66. Tam V, Patel N, Turcotte M, et al. Benefits and limitations of genome-wide association studies. *Nat*  
613 *Rev Genet* 2019;20(8):467-84. doi: 10.1038/s41576-019-0127-1 [published Online First:  
614 2019/05/10]
- 615 67. UK Biobank. Final data release from the world's largest whole exome sequencing project 2022  
616 [Available from: [https://www.ukbiobank.ac.uk/learn-more-about-uk-biobank/news/final-data-](https://www.ukbiobank.ac.uk/learn-more-about-uk-biobank/news/final-data-release-from-the-world-s-largest-whole-exome-sequencing-project)  
617 [release-from-the-world-s-largest-whole-exome-sequencing-project](https://www.ukbiobank.ac.uk/learn-more-about-uk-biobank/news/final-data-release-from-the-world-s-largest-whole-exome-sequencing-project)] accessed 10 October, 2022.
- 618 68. Wang Q, Dhindsa RS, Carss K, et al. Rare variant contribution to human disease in 281,104 UK  
619 Biobank exomes. *Nature* 2021;597(7877):527-32. doi: 10.1038/s41586-021-03855-y [published  
620 Online First: 2021/08/11]
- 621

622 **AUTHORS' CONTRIBUTIONS**

623 BR planned the study, performed the analyses, and drafted the protocol. WW and DH had a major role  
624 in the conception of the study, provided methodological and content expertise, and revised the  
625 manuscript. MC, RW, SM, KR, DM, JM, RB and YC provided methodological and content expertise,  
626 and had a major role in revising the manuscript. BR is the guarantor of the content of the study.

627

628 **FUNDING STATEMENT**

629 BR is supported by the Centre for Clinical Brain Sciences of the University of Edinburgh (Rowling &  
630 Dr Hugh S P Binnie scholarship), the Canadian Institutes of Health Research (CIHR; Doctoral Foreign  
631 Study Award, DFD-187711), the *Fonds de recherche du Québec – Santé* and the *Ministère de la Santé*  
632 *et des Services sociaux du Québec* (joint clinician-investigator fellowship), and the Power Corporation  
633 of Canada Chair in Neurosciences of the University of Montreal (research scholarship). KR is  
634 supported by Health Data Research UK (Rutherford fellowship MR/S004130/1), and the Wellcome  
635 Trust-University of Edinburgh Institutional Strategic Support Fund. SM is supported by the Clayco  
636 Foundation for RVCL research. DM is supported by the Wellcome Trust (216767/Z/19/Z). RB is  
637 supported by an Association of British Neurologists Clinical Research Training Fellowship funded by  
638 the Guarantors of Brain. DH is supported by a Wellcome Trust Senior Research Fellowship  
639 (215621/Z/19/Z) and the Medical Research Foundation. WW is supported by the Chief Scientist Office  
640 of the Scottish Government (CAF/17/01), the UK Alzheimer's Society and the Stroke Association, the  
641 National Institute for Health and Care Research (NIHR) and the National Institutes of Health (NIH).  
642 Funding sources had no role in the design or conduct of the study.

643

644 **COMPETING INTERESTS STATEMENT**

645 All authors have nothing to declare.

## 1. Manual curation of genes of interest

### Main signalling of type I interferon

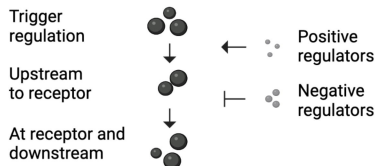

Screening      Functional relevance      Clinical relevance

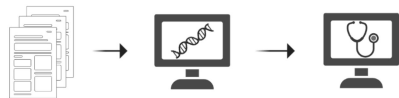

- |                      |                     |                 |
|----------------------|---------------------|-----------------|
| 1. Literature review | 1. UniProt platform | 1. OMIM         |
| 2. Gene Ontology     | 2. NCBI Gene        | 2. NCBI ClinVar |

## 2. Selection of variants of interest

Disease-causing variants from genotype-phenotype databases

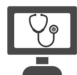

OMIM (disease-causing) and ClinVar (pathogenic, likely pathogenic) annotations

Gain-of-function variants

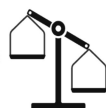

Loss-of-function variants

pLOF variants using functional annotation from UK Biobank exome

Alignment with OQFE pipeline (sample-level FASTQ to CRAM)

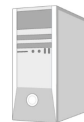

Variant calling with DeepVariant v0.10.0 (sample-level CRAM to gVCF)

Variant aggregation with GLnexus v1.2.6 (sample-level gVCF to joint genotype pVCF)

Annotation with Ensembl VEP, the LOFTEE filtering criteria and the M-CAP classifier, plus MAF <0.1% (joint genotype pVCF)

## 3. Association study

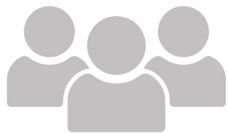

UK Biobank with whole-exome sequencing (n=469,807)

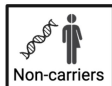

Non-carriers

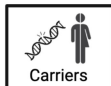

Carriers

Score analysis  
Rare variant genetic risk score  
Weights as -1/+1

Gene-level analysis  
Gene-based associations with SKAT-O in SAIGE-GENE+

Phenotypes of interest (n=18)

Cerebrovascular (n=4)  
Cardiovascular (n=4)  
Dementia (n=3)  
Autoimmunity (n=4)  
Neuroradiological (n=3)

Phenome exploration (n=196)

ICD-coded diagnoses

For those significant at Bonferroni-corrected p-value



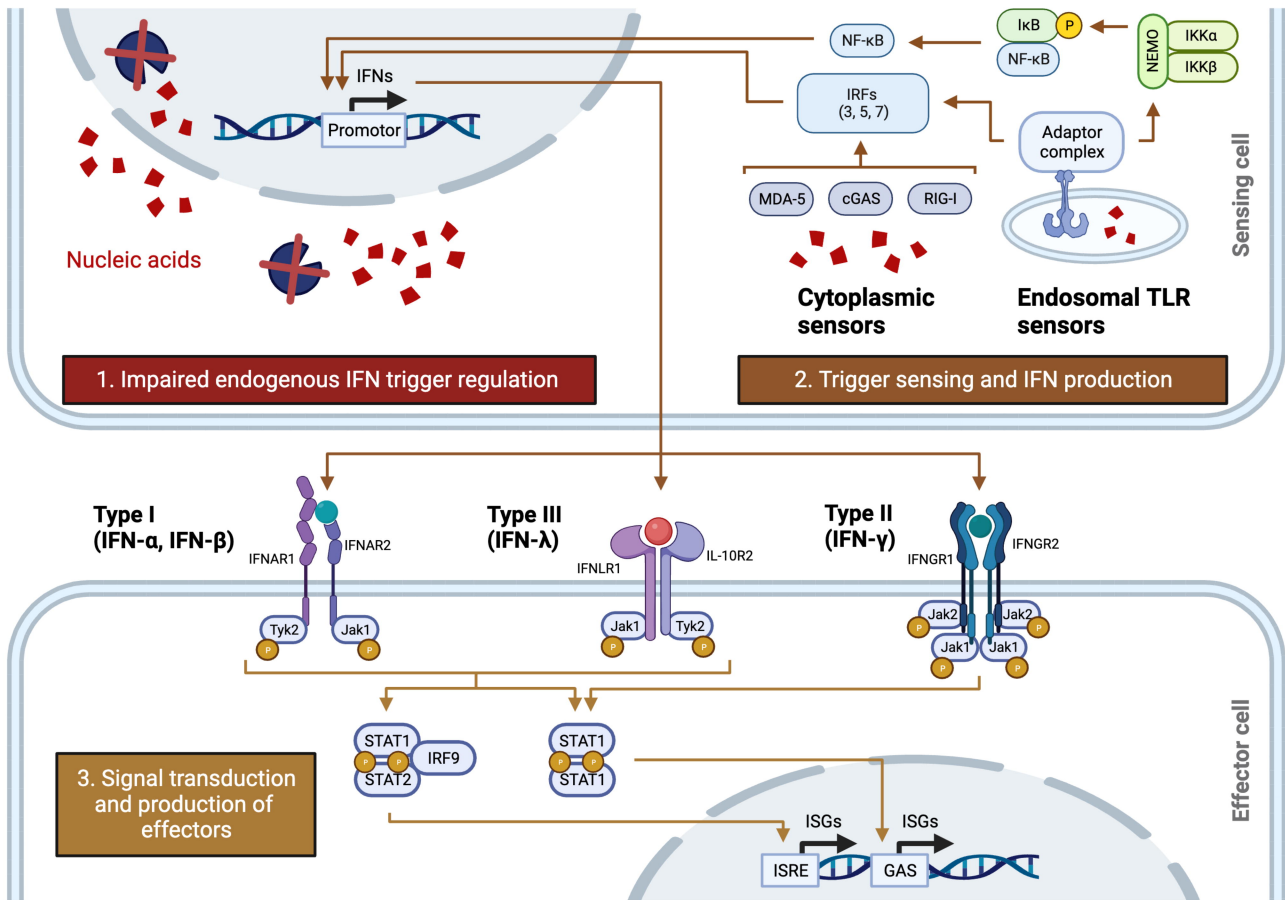

**A - 20% causal variants**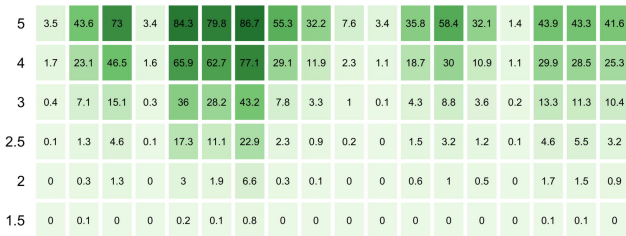**B - 30% causal variants**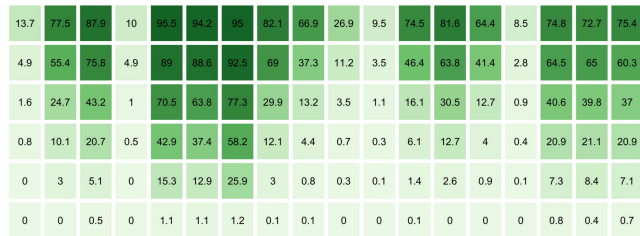**C - 40% causal variants**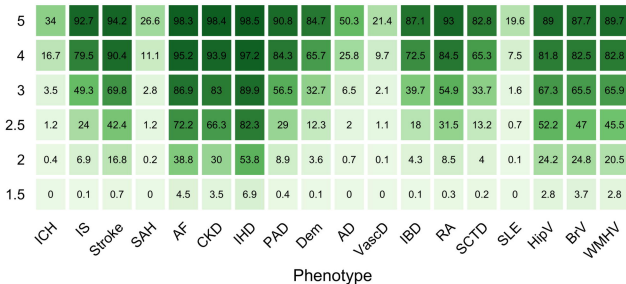**D - 50% causal variants**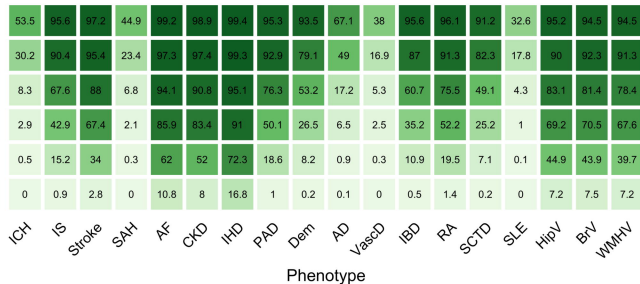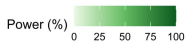

Source: https://medrxiv.org/content/10.1101/2023.10.12.23296935.full.pdf
